# Supplementary material for: Jitterbug: somatic and germline transposon insertion detection at single-nucleotide resolution
Source: PubMed Central journal article supplement (PMC4603299; doi:10.1186/s12864-015-1975-5), 2015-10-12

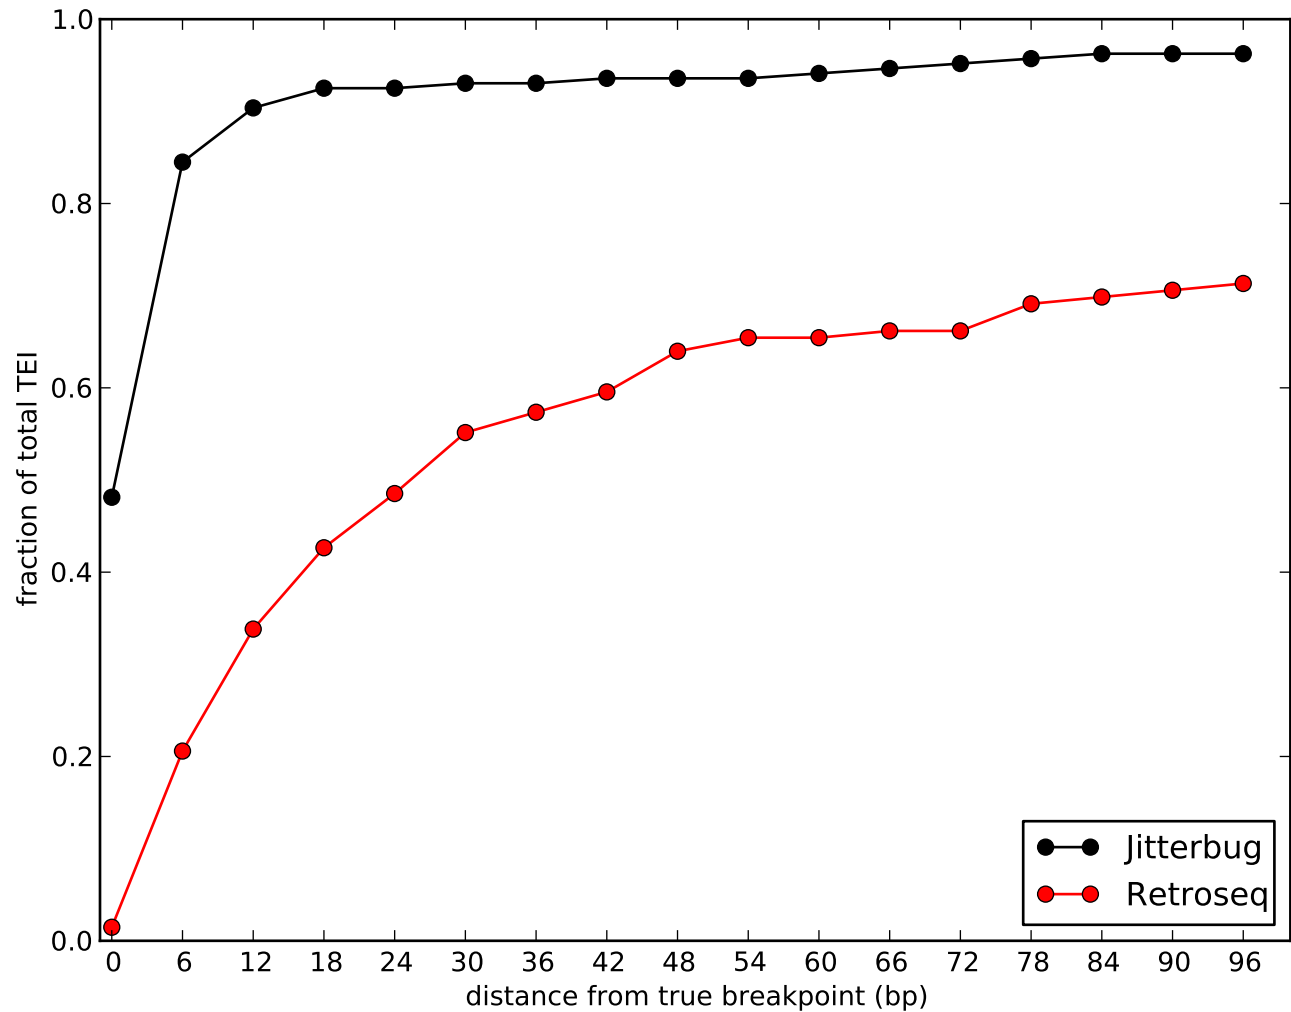

Supplement: 12864_2015_1975_MOESM5_ESM.pdf [file 12864_2015_1975_MOESM5_ESM.pdf]
