# Supplementary material for: Jitterbug: somatic and germline transposon insertion detection at single-nucleotide resolution
Source: PubMed Central journal article supplement (PMC4603299; doi:10.1186/s12864-015-1975-5), 2015-10-12
Supplement: 12864_2015_1975_MOESM8_ESM.pdf [file 12864_2015_1975_MOESM8_ESM.pdf]

runtime (h:m:s)

8 CPU, 16G RAM

---

|     | Jitterbug | RetroSeq |
|-----|-----------|----------|
| 10X | 0:01:58   | 0:22:59  |
| 20X | 0:03:46   | 1:15:06  |
| 40X | 0:06:52   | 3:41:07  |
