# Supplementary material for: Jitterbug: somatic and germline transposon insertion detection at single-nucleotide resolution
Source: PubMed Central journal article supplement (PMC4603299; doi:10.1186/s12864-015-1975-5), 2015-10-12
Supplement: 12864_2015_1975_MOESM9_ESM.pdf [file 12864_2015_1975_MOESM9_ESM.pdf]

A

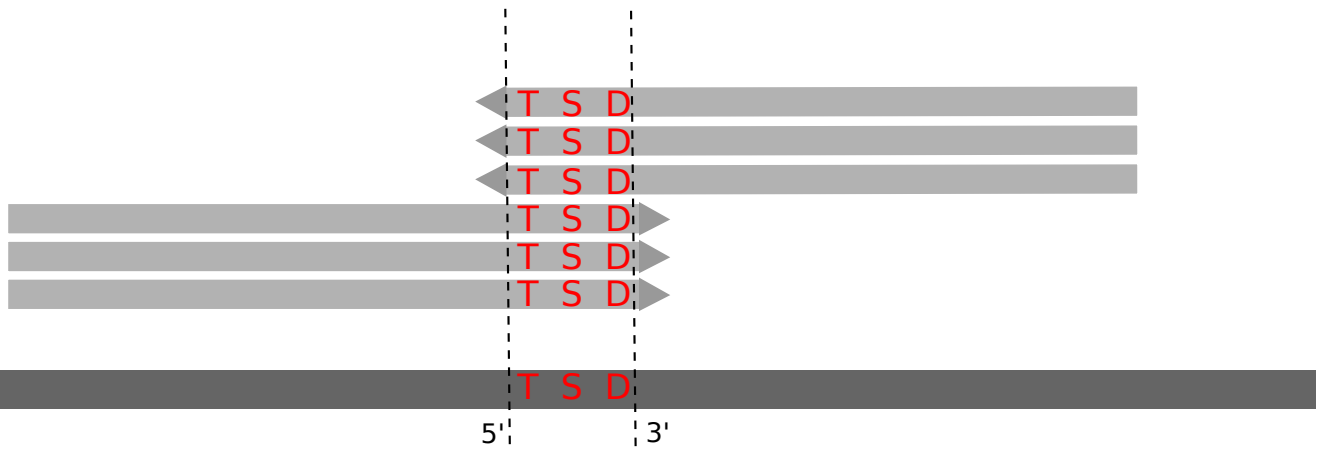

B

Example 1: 5bp distance reported between Jitterbug and PacBio alignment breakpoints

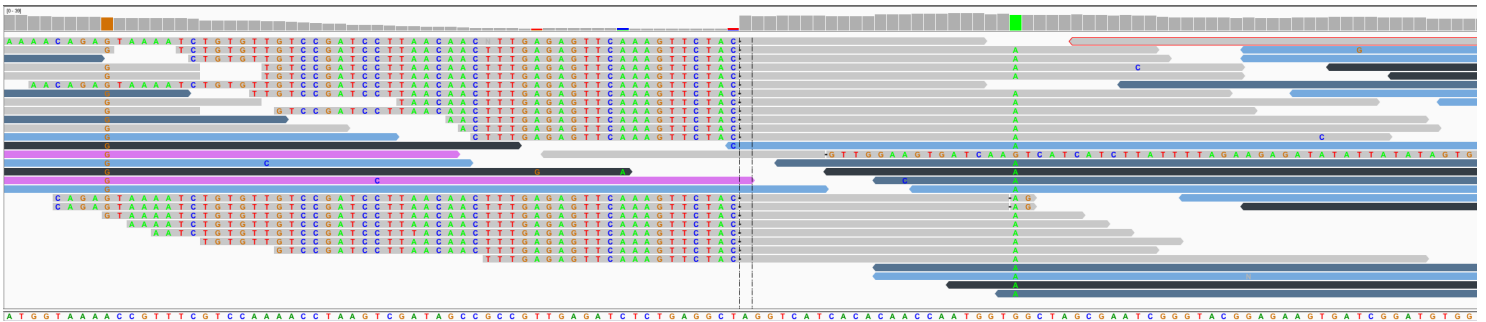

IGV screenshot: Ler-1 Illumina reads aligned to Col0 reference

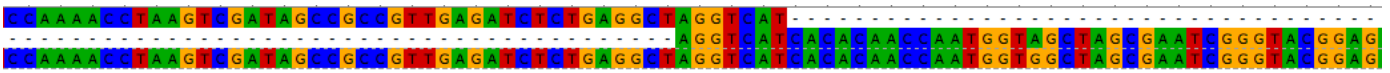

Split BLAT alignment of one Ler-1 PacBio read (top two sequences) to Col0 reference (bottom sequence)

Example 2: 0bp distance reported between Jitterbug and PacBio alignment breakpoints

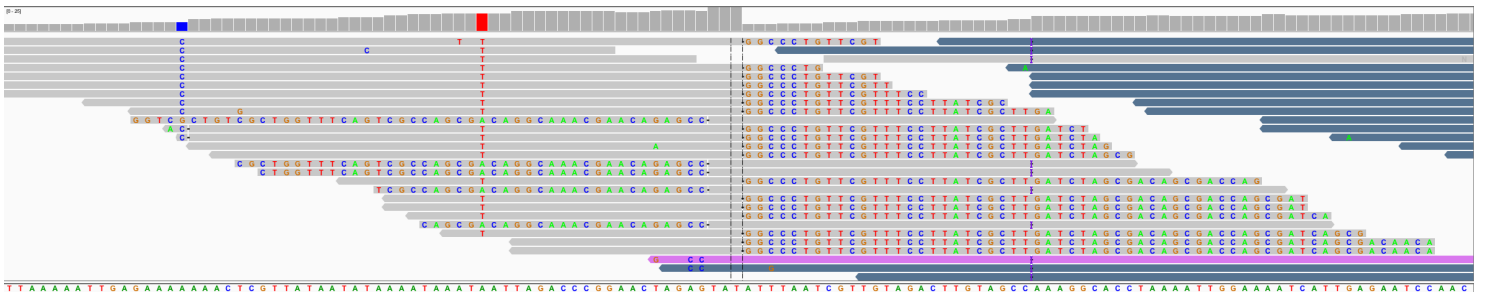

IGV screenshot: Ler-1 Illumina reads aligned to Col0 reference

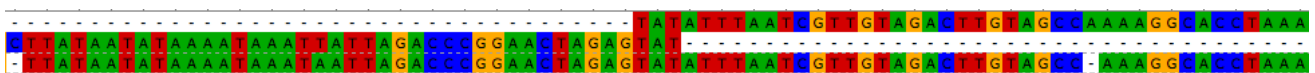

Split BLAT alignment of one Ler-1 PacBio read (top two sequences) to Col0 reference (bottom sequence)
